# Supplementary material
Source: publisher figshare collection journal article supplement (https://rs.figshare.com/ndownloader/files/23195996)
Supplement: Supplementary file 1 [file 23195996]

Electronic Supplementary Material

**Fine-scale genital morphology affects male ejaculation success: an experimental test**

Meng-Han Joseph Chung1, Rebecca J. Fox1, Michael D. Jennions1

1. Division of Ecology and Evolution, Research School of Biology, Australian National University, Canberra, ACT, Australia

**Author for correspondence:**

Meng-Han Joseph Chung, e-mail: [meng-han.chung@anu.edu.au](mailto:meng-han.chung@anu.edu.au)

*1) Part (a)- Day 8 sperm count*

|  | estimate | std. error | df | F value | P value |
| --- | --- | --- | --- | --- | --- |
| Intercept | 15.152 | 0.103 | 1 | 21825.492 | **<0.001** |
| Treatment (control) | 0.156 | 0.147 | 1 | 1.137 | 0.289 |
| Body size (standardized) | 0.116 | 0.104 | 1 | 1.243 | 0.268 |
| Treatment*body size | 0.185 | 0.148 | 1 | 1.569 | 0.214 |
| Residuals |  |  | 86 |  |  |

*2) Part (a)- Day 20 sperm count*

|  | estimate | std. error | df | F value | P value |
| --- | --- | --- | --- | --- | --- |
| Intercept | 9.584 | 1.718 | 1 | 31.137 | **<0.001** |
| Treatment (control) | 0.641 | 0.155 | 1 | 17.110 | **<0.001** |
| Body size (standardized) | 0.198 | 0.110 | 1 | 3.252 | 0.075 |
| Log of Day 8 sperm count | 0.348 | 0.113 | 1 | 9.441 | **0.003** |
| Treatment*body size | -0.167 | 0.156 | 1 | 1.146 | 0.287 |
| Residuals |  |  | 85 |  |  |

*3) Part (b) first set- Day 8 sperm count*

|  | df | Sum Sq | F value | P value |
| --- | --- | --- | --- | --- |
| Intercept | 1 | 11049.9 | 32863.206 | **<0.001** |
| Body size (standardized) | 1 | 4.6 | 13.539 | **<0.001** |
| Treatment | 3 | 0.0 | 0.033 | 0.992 |
| Treatment*body size | 3 | 0.2 | 0.218 | 0.884 |
| Residuals | 178 | 59.9 |  |  |

*4) Part (b) first set- Day 20 sperm count*

|  | df | Sum Sq | F value | P value |
| --- | --- | --- | --- | --- |
| Intercept | 1 | 32.859 | 91.928 | **<0.001** |
| Log of Day 8 sperm count | 1 | 4.087 | 11.433 | **<0.001** |
| Body size (standardized) | 1 | 0.973 | 2.723 | 0.101 |
| Treatment | 3 | 5.158 | 4.810 | **0.003** |
| Treatment*body size | 3 | 0.120 | 0.112 | 0.953 |
| Residuals | 177 | 63.268 |  |  |

*5) Part (b) first set- Day 20 sperm count:*

*control or claw removed versus distal or entire tip removal*

|  | df | Sum Sq | F value | P value |
| --- | --- | --- | --- | --- |
| Intercept | 1 | 33.227 | 94.936 | **<0.001** |
| Log of Day 8 sperm count | 1 | 4.082 | 11.664 | **<0.001** |
| Body size (standardized) | 1 | 1.471 | 4.202 | **0.042** |
| Treatment | 1 | 5.099 | 14.568 | **<0.001** |
| Treatment*body size | 1 | 0.119 | 0.339 | 0.561 |
| Residuals | 181 | 63.349 |  |  |

*6) Part (b) second set- Day 8 sperm count*

|  | df | Sum Sq | F value | P value |
| --- | --- | --- | --- | --- |
| Intercept | 1 | 5232.1 | 19157.305 | **<0.001** |
| Body size (standardized) | 1 | 0.0 | 0.022 | 0.883 |
| Treatment | 2 | 0.1 | 0.221 | 0.802 |
| Treatment*body size | 2 | 0.6 | 1.088 | 0.342 |
| Residuals | 74 | 20.2 |  |  |

*7) Part (b) second set- Day 20 sperm count*

|  | df | Sum Sq | F value | P value |
| --- | --- | --- | --- | --- |
| Intercept | 1 | 10.227 | 18.515 | **<0.001** |
| Log of Day 8 sperm count | 1 | 1.407 | 2.548 | 0.115 |
| Body size (standardized) | 1 | 1.441 | 2.609 | 0.111 |
| Treatment | 2 | 1.626 | 1.472 | 0.236 |
| Treatment*body size | 2 | 0.274 | 0.248 | 0.781 |
| Residuals | 73 | 40.323 |  |  |
